# Supplementary material for: Ultra-dynamic assemblies of glycolytic enzymes by quinary determinants
Source: Research Square preprint supplement (doi:10.21203/rs.3.rs-7387153/v1), 2025-10-03
Supplement: Supplementary file 1 [file 03fa13839253118f17bf9087.docx]

**Supplementary Table 5. DHR10 variant pairs analyzed.**

| Pair # | Protein 1 | Protein 2 | Euclidean distance |
| --- | --- | --- | --- |
| 1 | DHR10_1 | DHR10_6 | 0.29 |
| 2 | DHR10_3 | DHR10_6 | 0.45 |
| 3 | DHR10_2 | DHR10_5 | 0.52 |
| 4 | DHR10 | DHR10_7 | 0.64 |
| 5 | DHR10 | DHR10_5 | 0.66 |
| 6 | DHR10_2 | DHR10_7 | 0.76 |
| 7 | DHR10 | DHR10_6 | 0.77 |
| 8 | DHR10_2 | DHR10_6 | 0.79 |
| 9 | DHR10_1 | DHR10_5 | 0.93 |
| 10 | DHR10_3 | DHR10_5 | 1.00 |
| 11 | DHR10_1 | DHR10_4 | 1.06 |
| 12 | DHR10_3 | DHR10_4 | 1.09 |
| 13 | DHR10_1 | DHR10_7 | 1.21 |
| 14 | DHR10_3 | DHR10_7 | 1.45 |
| 15 | DHR10 | DHR10_4 | 1.68 |
| 16 | DHR10_2 | DHR10_4 | 1.73 |
