# Supplementary material for: Ultra-dynamic assemblies of glycolytic enzymes by quinary determinants
Source: Research Square preprint supplement (doi:10.21203/rs.3.rs-7387153/v1), 2025-10-03
Supplement: Supplementary file 2 [file 386e11bf7fbaa0cea578b22f.docx]

**Supplementary Table 4. DHR10 variants selected.**

| Name | PDB file | Sequence |
| --- | --- | --- |
| DHR10 | 5cwg-r2-af1 | MSSEKEELRERLVKIVVENAKRKGDDTEEAREAAREAFELVREAAERAGIDSSEVLELAIRLIKEVVENAQREGYDISEAARAAAEAFKRVAEAAKRAGITSSEVLELAIRLIKEVVENAQREGYDISEAARAAAEAFKRVAEAAKRAGITSSETLKRAIEEIRKRVEEAQREGNDISEAARQAAEEFRKKAEELK |
| DHR10_1 | NQ_0.4_rlx_LN1_5cwg-r2-af1_0004 | MSQEQEQLQEQLVNIVVENAKRKGDDTEQAREAAQEAFELVRQAAEEAGIDSSEVLELAIRLIKEVVTNAQQEGYDISKAAQAAAQAFKRVAQAAKRAGITSSEVLELAIRLIKEVVENAQQEGYDIQQAARAAAQAFQRVAEAAKRAGITSSQTLNRAINEIRKRVREAQNEGNDISQAAQQAANQFRKKAEELK |
| DHR10_2 | NQ_0_rlx_LN1_5cwg-r2-af1_0005 | MSSEKEELRERLVKIVVENAKRKGDDTEEATKAAREAFELVREAAERAGIDSSEVLELAIRLIKEVVENAQREGYDISKAARAAAEAFKRVAEAAKRAGITSSEVLELAIRLIKEVVENAQKEGYDITEAARAAAEAFKRVAEAAKRAGITSSETLKRAIEEIRKRVEEAQREGNDISEAARRAAEEFRKKAEELK |
| DHR10_3 | RKDE_0.4_rlx_LN1_5cwg-r2-af1_0001_E68T | MSETQERLRETLVKIVVTNAQRKGDDTEEATQAAREAFELVREAAHRAGIDSSSVLELAITLIKEVVTNAQQEGYDISTAAQAAAQAFSRVAEAAKRAGITSSTVLELAIRLITEVVTNAQQEGYDISTAATAAAQAFTRVAHAAKNAGITSSTTLQQAIEEIRTRVEQAQREGNDISQAAQQAANSFTKKANSLK |
| DHR10_4 | RKDE_0_rlx_LN1_5cwg-r2-af1_0003 | MSSTHTQLQQTLVTIVVQNAQNKGDDTSSATTAAHQAFQLVRTAAQQAGIDSSSVLQLAINLIQEVVQNAQQEGYDISTAAQAAAQAFQRVAHAAKQAGITSSTVLQLAITLISEVVTNAQQEGYDISTAATAAAQAFTRVAHAAKQAGITSSQTLQTAINEIRSRVQQAQQEGNDISQAAHQAAQQFTQHAHELK |
| DHR10_5 | RKDE_1.0_rlx_LN1_5cwg-r2-af1_0001 | MSEEKEELRERLVKIVVENAKRKGDDTEEAREAAKEAFELVREAAERAGIDSSEVLELAIRLIKEVVENAQREGYDISKAARAAAEAFKRVAEAAKRAGITSSEVLELAIRLIKEVVENAQREGYDIEEAARAAAEAFKRVAEAAKRAGITSSETLKRAIEEIRKRVEEAQREGNDISEAAREAAEEFRKKAEELK |
| DHR10_6 | ST_0.4_rlx_LN1_5cwg-r2-af1_0003 | MSEETETLRERLVKIVVENAKSKGDDTEEASKAASTAFELVKEAASRAGIDSSSVLELAIRLISEVVTNAQREGYDISTAARAAATAFSRVAEAAKRAGITSSEVLTLAIRLISEVVENAQREGYDISEAATAAAEAFTRVAEAAKSAGITSSTTLSRAIEEIRSRVSTAQSEGNDISEAARQAAETFRKKAESLK |
| DHR10_7 | ST_0_rlx_LN1_5cwg-r2-af1_0001 | MSKEKEELREKLVKIVVENAKRKGDDTEEAREAAKEAFELVREAAERAGIDSSEVLELAIRLIKEVVENAQREGYDIDRAARAAAEAFKRVAEAAKRAGITSSEVLELAIRLIKEVVENAQREGYDIEEAARAAAEAFKRVAEAAKRAGITSSETLKRAIEEIRKRVEEAQREGNDISEAARQAADEFRKKAEELK |
