# Supplementary material for: Ultra-dynamic assemblies of glycolytic enzymes by quinary determinants
Source: Research Square preprint supplement (doi:10.21203/rs.3.rs-7387153/v1), 2025-10-03
Supplement: Supplementary file 3 [file ada83a037bcdb08339417ba8.xlsx]

## Sheet: log2FC
Protein	PGI1	FBA1	PGK1	ENO2	CDC19	THR4
AAD16	NA	-0.733229	-1.5845	NA	-4.58933	NA
AAP1	-1.20226	-2.70504	4.06796	2.09561	-1.78863	2.13645
AAT2	-1.75981	-1.36915	0.360501	-0.0829609	-0.891267	-1.26715
ABF1	2.85872	4.18319	0.947788	4.24701	NA	1.88936
ABP1	-0.305641	-0.324417	-0.668237	-0.333669	-0.940709	-0.252497
ACC1	-2.73368	-5.28211	-5.54256	-5.95215	-4.62143	-1.83099
ACF2	3.51669	1.60087	1.41241	1.99203	2.58756	2.8622
ACO1	-2.20355	NA	-0.739964	-0.132622	-3.37116	-0.6868
ACS2	3.81414	-0.0360186	0.521507	3.5283	3.43237	4.31266
ACT1	0.659718	0.295466	0.0651759	0.505504	0.555604	1.29018
ADE12	1.35077	0.748585	-1.22485	1.36829	1.15564	3.60633
ADE3	0.480528	-1.38637	-1.00987	-1.4061	-0.274341	0.572586
ADE4	4.70224	4.98916	2.18435	1.91839	3.19272	4.90716
ADE57	0.0701684	-0.531825	-0.815022	-0.643286	-0.0766866	0.308733
ADE6	0.26949	1.82991	3.64479	4.48728	2.65186	3.53207
ADH1	-0.214801	-1.86995	-0.620592	0.52475	-1.88603	0.634491
ADH3	2.21531	3.05034	4.06315	3.94861	2.15771	2.23947
AFG2	2.92632	1.65766	5.38942	-0.0115056	2.65759	-1.01009
AHA1	1.30719	1.45684	2.01128	2.43789	2.27488	1.40455
AHP1	0.136735	1.78699	2.04393	3.4081	2.33898	1.09131
AIM2	0.510325	-1.22526	0.900979	0.9712	0.520221	-1.08271
AIR1	2.30122	2.22426	2.35614	1.12834	3.09057	2.29463
ALA1	-0.293953	-0.876587	-0.377367	0.318551	-0.853011	0.479981
ALD6	0.776214	0.557214	1.25729	1.47267	0.429544	0.980061
ALE1	-1.99954	NA	NA	NA	NA	NA
ALG12	NA	NA	NA	NA	NA	NA
AMD1	9.18211	10.0377	9.42314	9.77722	9.53026	6.90995
APA1	0.822216	2.84146	1.53321	2.85432	2.70203	1.15299
APD1	2.36333	1.02751	2.13086	0.601043	2.97266	NA
APE2	0.731161	1.44458	1.77413	2.39456	1.36706	-0.55801
APL5	-1.12218	-3.03872	-3.07414	-1.91354	-2.10209	-1.498
APL6	5.24848	NA	-0.826849	4.46616	NA	NA
APQ12	-3.86376	-0.828582	NA	-0.865309	NA	NA
APT1	4.48443	6.74308	6.26045	6.93438	6.81518	5.17566
ARA1	1.48572	1.28107	0.831558	1.13164	1.56134	0.693934
ARB1	2.58381	2.09484	2.31988	1.5289	1.92952	1.17334
ARC1	-1.64452	-3.91587	-3.78175	-4.09613	-3.16511	-0.74518
ARC18	3.79128	3.79683	3.69366	3.61668	3.82999	3.24963
ARC35	2.75436	2.79035	2.04211	2.45631	2.4231	1.32229
ARC40	1.84084	-0.155426	1.37559	0.278959	0.523218	NA
ARD1	4.08156	3.80287	3.80203	2.94825	5.49201	3.88026
ARF1	3.91524	2.89342	2.14331	1.37338	4.16895	4.22205
ARF2	NA	NA	NA	NA	NA	NA
ARG4	2.47289	2.105	1.22718	-0.048201	0.841318	1.61022
ARN1	NA	NA	NA	NA	NA	NA
ARO1	-0.899345	-1.20776	-1.59565	0.699942	-0.506684	-0.141812
ARO2	3.95843	3.70646	4.03933	3.02439	3.99083	2.60804
ARO3	0.411998	0.426654	0.414968	1.13596	-0.0413493	0.00611324
ARO4	2.25546	2.86538	2.71696	3.61756	2.73811	2.13323
ARO8	1.30506	0.875446	0.526347	0.744885	0.372984	0.855682
ARO9	1.54453	NA	-1.78585	1.07479	0.0314277	1.03439
ARP2	-0.719311	-2.65275	-3.03223	-1.47904	-1.65764	-1.50377
ARP3	-2.28032	-2.53933	-3.28993	-3.42684	-2.11235	-3.28186
ARP4	NA	NA	0.298648	-0.147521	NA	-0.385079
ARP7	4.94609	NA	2.94299	3.99379	0.684127	NA
ASC1	0.0563704	-0.578378	-0.314753	-1.11124	0.345335	0.0380844
ASN1	-0.316841	-0.507277	-0.476287	-0.26355	-0.422099	-0.482574
ASN2	0.41759	-1.3205	-0.933055	-0.124737	-1.61353	1.4
ASP1	2.62733	-0.742072	2.50881	3.25474	1.61766	1.94281
ATG27	0.588117	1.0194	1.06961	1.15506	1.49442	1.75631
ATP1	-0.704861	-2.86332	-0.551565	0.0601083	-1.19605	0.0318122
ATP2	1.69744	-1.85111	0.862573	1.80805	0.650696	2.70802
ATP6	1.72668	NA	1.08051	0.0480567	0.418795	NA
BAT1	-0.252989	0.304246	0.404356	-0.0263652	-0.206479	1.03644
BAT2	1.1424	-0.374885	-0.782922	-0.327443	4.74295	4.64434
BBC1	4.28349	3.43313	3.24272	1.93872	4.31301	4.3408
BCH1	2.34903	1.37861	0.631913	1.67816	1.30973	NA
BCY1	2.1534	0.809143	1.59466	0.705035	1.03249	1.7576
BDF1	NA	NA	0.514487	0.22142	NA	0.983169
BEM4	-0.482157	NA	-3.47581	NA	-1.77279	NA
BFR1	-3.11852	-4.13405	-3.70979	-2.49827	-6.96057	0.302042
BFR2	NA	NA	2.01131	-1.59161	NA	0.764682
BGL2	-0.814982	-0.577952	-0.571771	0.24729	-0.518587	-1.28018
BMH1	1.6247	0.759622	-0.252415	0.77316	0.762251	-1.21336
BMH2	-2.38649	-0.472698	-1.26785	-0.760183	0.234561	-0.50752
BNA2	NA	NA	NA	NA	NA	NA
BPH1	NA	NA	2.13365	2.85044	NA	-0.569546
BRX1	0.704497	0.157142	0.580709	1.54743	-0.787575	0.105613
BUB1	NA	NA	NA	-7.27704	NA	NA
BUD3	5.54149	6.2254	5.10464	4.75058	7.00615	5.08347
CAB1	0.668876	-1.46411	-0.34689	-0.875948	-1.89827	-3.57196
CAB2	0.181487	-0.661378	NA	0.36034	-0.0767955	2.81736
CAB4	-1.89064	-0.82292	-1.86632	-1.48326	-0.297567	NA
CAF20	0.667743	1.9263	1.11465	2.11082	2.2678	NA
CAJ1	1.66566	-1.45634	-3.25011	0.0745552	-1.72722	-1.04964
CAM1	2.94344	0.948597	2.18093	2.70368	2.59408	2.09096
CAR1	3.12628	3.00587	2.63049	2.31276	2.86216	2.81909
CBC2	1.56946	2.69747	2.51427	2.84056	2.75806	0.945016
CBF1	5.76087	1.79054	4.1586	4.02275	4.35527	1.02658
CBF5	0.584054	0.478563	-0.106967	0.225214	3.52141	1.34553
CBK1	0.473402	0.621068	0.817497	-0.654192	1.65937	-1.70688
CCP1	-0.66929	-5.30284	-5.03245	-4.73067	-2.24572	-0.710061
CCR4	1.51438	1.02831	0.884256	1.18592	-0.0858708	0.669766
CCS1	-2.40997	-0.908948	-1.6693	-1.68419	-0.936299	-0.130445
CCT2	3.13901	NA	2.20838	2.35288	2.14592	2.59834
CCT3	3.48375	2.21937	2.47492	2.67385	2.87669	3.16777
CCT4	-0.978446	-3.63212	-0.245961	-0.474199	-1.54435	-1.16402
CCT5	2.31774	2.16034	2.27502	1.99914	2.47326	1.75628
CCT6	0.448475	-1.76571	0.208134	0.130787	0.0685003	-1.065
CCT7	NA	NA	-1.2492	1.75289	1.4554	0.454533
CCT8	0.0266554	-0.646499	-0.901741	-1.60227	-0.253668	-0.873593
CDC11	-2.61199	-3.54676	-4.04004	-6.3781	-4.55954	-4.124
CDC12	4.86657	3.80173	4.09606	3.11219	3.56156	4.36693
CDC19	-0.0157955	0.0026637	-0.408155	-0.168086	-2.40594	0.354065
CDC34	-0.53995	-1.82169	-0.280411	-0.8894	1.58973	0.314889
CDC42	4.08361	4.45382	2.71815	3.38687	5.17381	4.09881
CDC45	NA	NA	NA	NA	NA	NA
CDC48	1.60459	1.10649	1.42137	1.46267	1.92788	0.747332
CDC60	1.83242	1.3272	0.973857	1.41577	2.0714	2.35035
CDS1	1.48517	-0.961874	NA	NA	NA	NA
CHC1	1.55327	-0.298127	-0.864254	0.220628	-0.159761	0.723596
CHD1	-1.17774	-0.638248	-0.798264	0.569618	-0.345751	1.58523
CIT1	1.38883	-2.18552	-3.52273	-0.705179	1.3691	1.63086
CIT2	2.15973	1.48613	-0.232152	1.48617	3.19334	-0.0969453
CKA2	2.70597	NA	NA	0.296585	5.28679	NA
CKB1	2.21905	0.837717	1.83012	1.16521	2.69428	1.92801
CKB2	0.106982	NA	-1.6353	-4.05283	-2.29409	0.0064912
CLU1	0.895444	-0.359296	-0.198244	-0.114732	0.950318	1.26967
CMS1	-0.0396469	0.825435	0.913682	1.44478	0.656249	-0.680582
CNA1	0.925914	0.278291	-0.223814	-1.10664	1.42321	1.7371
CNS1	-0.103258	0.825965	4.5008	4.45647	4.73831	-0.597801
COP1	0.660933	-0.93822	-0.388091	0.58807	-0.172364	0.0802486
COX1	NA	-0.367531	-0.247268	NA	NA	0.185515
COX15	NA	NA	NA	NA	NA	NA
COX2	1.8895	0.255708	0.0199893	1.16858	1.25061	0.408094
CPA2	1.61584	2.76291	2.92994	2.68162	2.98537	2.00336
CPR6	0.35154	-0.0623112	0.490858	0.559699	-0.0171017	-0.388278
CPS1	-3.59561	-6.26922	-4.42428	-3.17926	-5.86871	-5.27231
CRH1	5.23234	5.79845	5.49884	4.74929	5.67424	NA
CRN1	7.80739	5.75049	5.78705	6.70216	6.97527	6.36067
CRS1	-1.66949	-2.83826	-2.12675	0.0073213	-2.58966	-1.42861
CSE1	-2.9279	NA	NA	-0.591764	NA	-0.683495
CSI1	NA	NA	NA	NA	NA	NA
CSL4	3.26051	3.59272	4.26788	4.16025	4.58658	3.42356
CSR1	0.178257	-1.84182	-4.94013	-5.43155	-0.724314	-0.622206
CTK1	-0.770528	0.367234	0.316013	2.29169	2.97596	0.633792
CTR86	NA	NA	NA	-2.37676	NA	NA
CUB1	1.00406	0.577603	1.45791	1.69247	0.397592	-0.461802
CYC7	NA	NA	NA	-1.2689	NA	0.720111
CYC8	-1.15329	-0.821384	-1.21386	-1.65392	-2.84325	-0.415968
CYS3	0.197953	-0.947562	0.383432	0.971211	-0.374324	0.750138
CYS4	1.27444	0.833204	0.876508	1.29602	1.49876	1.42115
CYT1	0.713884	NA	NA	-1.77101	NA	-2.07204
DAP2	2.14266	NA	4.8192	5.47635	5.74941	3.78761
DBF20	-0.365695	NA	1.12451	NA	NA	NA
DBP10	-2.80534	-1.31756	0.921695	-2.53963	NA	-0.862652
DBP2	1.47671	0.524793	0.368438	-0.255833	0.226548	1.50569
DBP3	-0.213994	-0.839216	-0.0865632	0.496344	-0.0542561	0.563312
DBP5	0.977385	0.37717	1.20672	0.121667	-0.601852	1.0294
DBP9	-0.0130005	0.827601	1.06314	1.93049	-1.35789	-3.64804
DCR2	NA	NA	NA	NA	NA	NA
DCS1	0.775015	-1.89018	-3.20139	1.0578	0.485057	NA
DDR48	3.18512	0.783696	0.901511	0.108688	-0.976939	NA
DED1	2.81729	2.05776	1.64566	0.258587	2.57673	2.85566
DED81	-0.949681	-0.917245	-1.41716	-0.388781	-1.26207	-0.370585
DEF1	2.33369	2.5633	3.17991	3.79961	2.48601	1.53674
DEP1	NA	NA	NA	NA	NA	NA
DHH1	2.71964	2.66814	2.44267	1.67932	2.52108	2.80184
DID2	3.44662	3.75513	3.82697	2.82237	4.00336	1.19229
DIG1	5.55567	4.70532	5.41228	7.00659	2.44695	6.48827
DIM1	1.49085	0.302572	1.22506	1.13899	1.23496	1.24724
DIP5	0.26001	1.21714	2.00879	1.57642	NA	NA
DOA1	0.598973	NA	NA	-0.56128	NA	NA
DPM1	1.97627	1.58737	1.18383	1.62294	2.66075	1.1357
DPS1	0.545923	-0.0582157	0.204948	0.115577	0.482396	1.03423
DRE2	0.4356	2.24173	1.34383	1.82724	1.98629	0.628612
DRS1	-4.63641	-1.31202	-1.56865	-2.71471	-6.13067	0.124733
DST1	2.58921	1.03438	4.62219	1.62148	2.36747	1.30746
DUF1	-1.95875	NA	NA	NA	NA	NA
DUG1	2.44239	2.72921	8.13999	5.74063	NA	0.953045
DUR12	-1.13509	-5.47144	NA	-5.60509	-2.16428	1.65534
DUS3	NA	-0.148813	-0.385969	-4.54035	1.41685	1.26802
DYS1	0.169046	-0.432616	0.247916	1.00828	-1.81793	-2.78304
EAP1	3.88183	3.28021	2.89348	2.8409	4.10339	3.98399
EBP2	-0.428246	0.726532	2.29913	1.14995	NA	NA
ECM14	-0.669658	1.66873	0.541562	3.67723	2.13374	-0.354412
ECM18	NA	NA	NA	NA	NA	NA
ECM30	NA	-2.34278	0.433876	0.157514	NA	-0.572852
EDE1	6.98596	6.19616	7.12737	6.45372	7.16105	4.53292
EFB1	1.56339	1.96575	1.91956	1.91735	2.3063	1.42101
EFR3	3.02088	2.22493	1.24458	-0.601262	1.5374	NA
EFT1	-0.733169	-0.924645	-0.639548	-0.437484	-0.133399	-0.524063
ELO2	NA	NA	0.316317	-1.90062	0.488915	NA
EMI2	1.83176	0.575089	-0.932468	-0.98563	0.981389	0.0731358
EMW1	1.95124	0.123571	-0.813683	-0.128726	-0.724016	-0.0303187
END3	-0.584104	-3.44954	-3.62822	-3.83155	-1.93195	-1.00831
ENO2	-0.471068	-0.0698441	0.326916	0.235477	-0.0658054	-0.476984
ENP1	1.86137	3.91292	2.58401	3.22937	3.18797	2.64444
ENP2	0.129143	2.91652	1.16101	5.24711	1.92067	3.58217
ENT2	1.78884	3.46452	2.82309	2.91934	2.69695	3.36679
ENT3	4.30204	2.14631	3.56805	3.59518	4.26374	3.34776
ENT5	2.88975	2.55306	2.08752	1.70982	2.42957	2.64825
ERB1	-0.733979	0.634402	0.0912739	1.04455	-1.25752	0.125613
ERD2	NA	NA	NA	NA	NA	NA
ERG1	-1.0203	-2.46329	-2.72208	-1.27132	-1.36889	-1.0812
ERG10	0.815668	0.360363	1.33294	2.42255	1.08757	0.581097
ERG11	-0.803492	-1.78301	-1.36465	-1.19221	-0.769856	-0.644538
ERG13	0.666332	-1.17933	0.222973	-0.29045	0.0795496	0.714796
ERG2	-0.77475	-2.151	-1.57423	-0.633555	-1.66179	0.147393
ERG20	0.364779	-0.16469	-0.457641	-0.0247203	0.244967	0.826832
ERG26	NA	-6.68842	NA	-6.00194	-8.06238	NA
ERG3	1.93837	1.81546	3.00773	2.63046	-2.26286	3.22236
ERG4	-0.0625253	-0.178133	-0.453529	0.20862	-1.01423	NA
ERG5	-0.410142	-1.97391	-2.93196	2.03661	-0.403011	NA
ERG6	-1.2323	-1.4715	-1.76986	-2.12516	-1.26388	-1.36186
ERG9	1.56038	-0.365973	0.125235	0.073676	1.25475	-0.0337308
ERJ5	2.50701	3.42443	2.86694	3.16944	3.7425	1.54196
ERO1	0.961869	0.65802	-2.10725	1.5204	NA	-2.82164
ERP2	-2.6804	-3.51448	0.0305597	-1.4518	-2.11867	NA
ERV14	0.760433	1.12029	1.02605	2.14567	0.675721	0.130754
ERV29	1.14948	0.445665	-0.267443	-0.350385	-1.36405	-1.77347
ETT1	-0.526592	-1.38233	-0.160673	-3.49165	NA	NA
FAA4	2.7807	1.70761	0.45763	-1.1218	0.270616	1.72671
FAP7	1.99284	5.06536	4.69892	4.87835	5.39646	4.71209
FAS1	0.14049	-0.936907	-0.797331	-0.953795	-0.21444	-0.215045
FAS2	-0.396162	-1.72582	-1.52485	-1.13967	-1.3238	-0.949863
FBA1	0.141338	-0.286216	1.8381	2.94078	0.738131	-0.559755
FCY2	3.31047	5.54239	5.34879	5.6966	3.6044	4.62923
FES1	3.13989	3.78469	3.07829	3.78979	3.82013	0.69457
FET3	NA	-0.616825	0.485938	NA	NA	1.00943
FKS1	-0.623408	-0.515883	-1.57899	-1.67236	-0.798048	-0.199262
FLO11	0.591182	-0.11618	1.91359	0.526564	NA	NA
FMP27	NA	NA	NA	4.49569	NA	NA
FOB1	NA	-1.69098	NA	0.317874	NA	-1.75583
FRE1	NA	NA	NA	-8.04526	NA	NA
FRE5	NA	NA	NA	NA	NA	-1.20712
FRS1	1.69122	0.822585	1.17922	3.12159	1.63791	1.37884
FRS2	2.07164	2.2013	2.5928	2.98697	3.04881	1.58161
FTR1	-0.194063	-0.465559	-0.204446	0.0905741	-0.190291	0.184207
FUN12	0.88915	0.214723	0.292685	0.0244612	0.909765	0.344046
FUR1	-4.30532	-1.6921	-2.89689	-1.27507	-2.52481	-4.87097
GAL83	-1.99661	-0.963055	-3.06191	-2.12819	-2.17526	-4.25668
GAP1	3.64776	0.996759	4.36553	3.57433	1.29232	1.94906
GAR1	-2.14121	0.230049	-0.950703	0.720697	NA	-1.20323
GAS1	-0.469161	-1.29255	-0.112654	-0.743192	-1.09515	0.530622
GBP2	-0.0521565	0.709437	-0.130385	-0.371167	1.03238	0.765562
GCD10	NA	NA	NA	NA	NA	NA
GCD11	-0.476048	NA	4.32804	5.69809	-1.85393	0.89936
GCD6	1.61509	-2.00139	2.91121	2.07958	1.4579	1.52989
GCN1	-1.49207	-4.46234	-0.454237	1.25816	-0.193288	-0.205695
GCN20	5.83792	3.51483	1.92608	4.53499	2.72195	3.47999
GCS1	7.47319	5.09402	5.00349	5.60931	5.82117	4.43583
GDE1	3.87675	-3.56996	-1.01954	1.25633	1.74602	-0.0653523
GDH1	2.83125	3.04926	2.87465	2.99088	3.60021	2.70521
GDH3	NA	NA	NA	NA	NA	NA
GDI1	-0.943167	-3.28667	-2.01956	-1.96211	-3.2935	-2.44226
GEF1	-7.86811	-7.53725	4.92982	4.68965	1.63148	NA
GET3	-0.454544	-0.878145	-1.11362	-1.12741	-0.391062	-2.20863
GET4	2.42103	-3.39574	3.66744	2.84237	1.5353	0.442258
GFA1	2.13804	-0.290172	-0.515905	-0.147999	0.218867	0.947795
GGA1	3.64838	5.91953	3.30402	1.50923	7.21913	6.49487
GIR2	0.678687	2.44842	3.52793	4.90246	5.33661	NA
GIS2	-0.294128	1.50856	NA	1.38307	1.1336	0.151593
GIT1	-3.24874	NA	NA	NA	NA	NA
GLC7	2.29426	0.192979	-0.580501	0.00638108	0.514267	0.638701
GLK1	3.34891	3.50537	2.89504	2.52815	3.96705	0.497744
GLN1	-0.370313	-0.874887	-1.49214	-0.685615	0.0482869	-0.0607269
GLN4	-0.448399	-1.22205	-0.894363	-0.518149	-0.853378	0.840026
GLO3	4.6927	4.84287	5.52293	4.68818	5.13238	4.00228
GLT1	4.95624	0.909653	1.00765	5.15706	2.62042	6.0446
GLY1	-0.519996	-0.104639	-0.101786	-0.298785	0.425475	-0.650922
GND1	0.541287	0.0835467	0.211984	0.83229	1.69645	0.0213677
GNP1	3.5993	4.91684	3.95467	4.79256	5.79602	3.63973
GOR1	NA	NA	NA	-0.596714	NA	NA
GPD1	1.70308	-0.00659946	0.537132	0.311449	3.92347	1.63928
GPD2	0.84264	0.421176	-0.358597	0.343378	0.0668329	0.448295
GPM1	0.655504	1.39354	0.629505	0.996506	1.58132	0.435631
GPP1	0.969155	1.45419	1.10901	1.99766	1.50905	1.27621
GRS1	1.15648	0.397345	0.701583	-0.429382	1.07663	0.431606
GSF2	2.29446	1.71041	0.42938	0.94054	1.07693	0.462008
GSP1	0.0198288	1.1004	0.574425	1.73083	1.23572	0.0354609
GSR1	5.37097	5.54031	5.27635	5.28624	4.58501	4.26054
GUA1	1.7952	-0.0488278	0.794691	1.04111	0.879509	1.42073
GUS1	-1.90741	-2.73014	-2.87098	-3.00878	-2.02651	-2.10071
GVP36	1.51854	-0.783786	0.471415	1.22094	0.907056	-1.76864
HAS1	0.537512	-0.803066	1.79872	1.9441	0.729259	1.80239
HCS1	NA	NA	NA	0.993431	NA	NA
HFA1	-1.41882	NA	NA	NA	-1.60424	-1.7431
HHF1	-0.385506	0.305182	0.258022	-0.146003	-1.42859	-1.12261
HHT1	-2.23961	-5.22692	-2.53082	-1.91603	NA	NA
HHT2	-1.01084	-1.00694	-1.92577	-2.33698	-1.00174	-0.44587
HIS5	4.0555	2.93507	3.0502	2.96221	3.77877	3.12924
HO	-0.932526	NA	-2.6158	-2.78813	0.556085	-1.88937
HOG1	0.990048	2.08999	1.97653	3.57533	2.40927	1.53662
HOM2	-0.57593	-1.12764	-1.31523	-1.15287	-0.407151	-0.253828
HOM3	2.48801	1.80935	0.178559	3.01509	2.21828	0.60251
HOM6	0.0455301	-0.814457	-0.407735	0.606514	-0.427774	0.229945
HRB1	-0.397379	1.35633	1.46045	2.09443	3.60699	3.88146
HRP1	2.56191	1.59745	1.98489	2.10836	1.96893	3.4186
HRR25	-0.108473	-0.771321	-0.491086	-1.1163	0.452278	-1.04705
HSC82	-7.07226	-2.78585	-9.06335	-6.04351	-8.25092	-6.5196
HSM3	0.205946	-1.26153	-1.1546	-0.477014	-1.16995	-1.3359
HSP104	-0.824308	-2.48892	-2.09063	-2.73651	-1.2505	-1.77047
HSP42	3.186	0.212157	-0.526638	0.205793	0.938995	-0.643758
HSP60	1.49923	1.08875	3.04682	3.97595	-0.582529	1.45369
HSP78	0.626625	NA	-4.48119	NA	NA	0.532256
HSP82	-0.900542	-2.48385	-0.760422	-0.749525	-1.83483	-0.992481
HTA1	-0.861582	-0.788009	-0.866636	-0.967499	-0.975567	-0.889579
HTA2	NA	NA	-2.53325	-0.354876	NA	NA
HTB1	0.925026	2.13889	2.34209	1.9992	1.26607	0.729782
HTS1	0.474681	-1.8384	-0.929345	1.05796	-1.53299	0.0691828
HXK2	0.901112	0.652924	1.71462	2.18485	0.741169	0.210567
HXT1	0.812579	0.206265	-1.0044	-0.204748	-1.13781	0.873008
HXT2	-1.36371	-2.48833	-1.35157	4.65961	NA	-0.00627069
HXT3	-1.58358	-2.30161	-1.82337	-2.15647	-2.15465	-0.645144
HXT6	0.0453888	NA	-0.866645	NA	NA	NA
HYP2	0.603399	0.678393	1.53861	1.37253	1.70087	-0.0292136
IDH2	NA	2.61094	1.56392	3.82965	3.13205	NA
IDP1	0.856968	0.852956	1.04074	2.57258	1.21144	0.920675
IFA38	0.155451	-2.52325	-1.56732	0.476067	-0.462489	-0.184542
IKI3	0.999077	-2.62663	-4.62088	0.323827	-1.65568	-0.27036
ILS1	-0.0582864	-1.30656	-0.795385	-0.0880011	-0.618579	-0.0506654
ILV1	NA	NA	-3.85353	1.1032	-5.01909	NA
ILV2	0.233373	3.39636	5.0506	6.46709	NA	0.343923
ILV3	1.19108	1.6988	0.300618	2.78473	0.349869	0.967371
ILV5	-2.59381	-3.39938	-3.69651	-2.88763	-4.47434	-2.37139
IMD2	NA	NA	4.09441	3.98663	-0.704348	NA
IMD3	4.26694	1.74443	2.33621	3.42193	2.66545	2.19304
IMD4	-2.34347	-2.28701	-1.1828	-0.270397	-0.652297	-1.63617
IMP4	0.624455	3.31667	5.13293	5.57317	4.64674	2.42813
INP53	3.2422	4.32324	4.11892	-0.486429	1.43016	3.14737
IPI3	1.89002	1.16377	NA	2.77103	1.54888	2.18246
IPP1	0.844905	1.20689	1.24205	1.73948	1.34962	0.540528
IRC22	-2.20764	-4.98914	-5.89243	-4.75535	-4.5978	-2.38342
ISW1	-3.74657	-2.31435	-2.68689	1.37679	-2.32484	-3.6417
ISW2	0.784474	-5.07834	-4.66102	NA	NA	NA
ITR1	NA	-0.302861	0.17736	NA	NA	NA
IVY1	-1.23742	-2.89997	NA	-7.76364	-2.01087	-1.49524
KAP123	-1.9476	-2.61268	-1.15497	0.300519	-2.87106	-0.558333
KAR2	-0.379219	-0.437019	-0.156153	0.483266	-0.511127	0.246411
KES1	1.15439	0.773813	1.3094	1.16594	0.25669	-0.938378
KRE2	1.27249	NA	0.468996	2.43067	NA	0.699994
KRE33	-0.183979	2.05726	0.0548566	-0.163523	0.518565	0.332517
KRE6	0.676757	0.00616119	0.111233	-0.642274	0.461463	0.111476
KRI1	NA	NA	1.15946	NA	NA	NA
KRR1	0.340657	-4.63689	1.53957	-2.31876	-2.74203	-0.331188
KRS1	-0.764789	-2.04153	-0.997295	0.344038	-2.27358	-2.68015
KTR1	2.26842	2.88708	1.60046	-0.682296	NA	1.43615
LEU1	-0.135642	0.590718	1.19159	0.773843	0.280821	1.52319
LEU4	-2.35582	-4.34575	-3.03242	2.13527	-0.841015	0.161105
LHP1	-1.06117	-0.639964	-2.16607	3.02306	-0.413756	-2.36081
LIA1	0.767439	1.78995	0.242339	1.82214	1.44414	1.00376
LOH1	NA	NA	NA	NA	NA	NA
LSB3	1.55562	0.462193	-0.126678	-0.309764	0.931324	1.18243
LSB5	1.99554	2.11449	-0.0675781	0.504369	-2.12053	NA
LSG1	1.72554	0.546143	0.212611	1.60295	0.764754	0.695403
LSM7	-4.08382	-1.24758	-1.24512	-1.19215	-0.271727	-1.84325
LSP1	1.52044	1.02648	0.747862	0.661604	1.93556	1.37912
LTV1	2.38321	1.26785	2.1008	0.686765	2.42451	1.80652
LUG1	NA	NA	4.03731	4.10108	-1.33455	NA
LYS2	0.69665	-0.298199	-1.13445	-2.44615	0.00158565	-0.721543
LYS21	-1.62101	-2.69502	-3.09628	-2.49597	0.582697	-7.20048
MAC1	2.97593	4.59979	0.506382	NA	2.67337	2.2239
MAK11	0.116311	0.421611	1.38323	3.13924	0.890197	0.895163
MAK16	-2.16491	-1.20175	0.439274	-1.01389	-0.733535	-1.1823
MAK21	-2.38929	-0.576834	-0.757046	-0.305448	-1.68418	-1.8482
MAP2	0.704766	1.94089	0.263411	-0.549007	1.75419	0.547814
MBF1	1.74561	4.46481	3.55419	4.25934	4.20526	1.03256
MCA1	6.19641	7.66086	7.0292	6.72309	7.70707	6.41554
MCK1	-0.90402	-3.57326	-1.79015	-2.86911	-0.722084	-3.77427
MCM2	-0.741259	1.58684	0.712713	1.41926	0.546109	0.660337
MCM3	4.07114	1.12595	2.26515	1.66209	2.55532	3.25103
MCM4	3.46197	2.35032	2.7899	2.96195	3.30084	3.15273
MCY1	0.162239	NA	NA	-2.44581	NA	NA
MED1	NA	-4.04876	-1.2605	NA	-0.799365	NA
MES1	-0.667336	-3.12757	0.088551	0.39588	-1.97875	-0.76288
MET13	0.831181	NA	NA	NA	NA	NA
MET17	0.187097	-1.05321	-1.38286	-1.61951	-0.843535	-0.125123
MET3	2.05601	0.234635	1.71821	-0.440239	2.63521	2.99971
MET5	2.52981	2.23653	1.96262	1.26716	0.242648	0.925838
MET6	0.104432	-0.86317	-0.642425	-1.0108	-0.942702	0.21489
MIA40	NA	NA	NA	0.625241	NA	NA
MIC60	-0.786429	NA	NA	-3.9087	-4.28989	-1.232
MKT1	3.05264	1.00158	2.13259	1.10785	1.41094	2.3117
MNN10	3.46142	4.09047	4.22069	3.99456	4.97659	3.67463
MNN11	-2.09973	-6.69077	-5.79308	-7.33907	-4.60163	-1.80848
MNN4	NA	NA	NA	NA	NA	NA
MNN9	1.10252	-0.0830222	0.798879	-0.502446	NA	0.952594
MPP10	-0.606587	2.15919	5.23106	3.30283	1.5713	2.07986
MRH1	4.24357	3.75077	3.20002	3.58206	2.25025	4.04079
MRN1	7.69272	6.89432	7.56006	8.10144	8.67525	6.78725
MRT4	-2.18499	-1.19828	-0.162651	-0.801848	-1.31826	-2.56533
MSN5	-1.11213	NA	3.95657	NA	NA	NA
MSR1	NA	1.26781	0.0756591	-0.2877	-0.205808	0.109806
MTC1	6.47713	6.2007	4.64293	6.54752	6.64761	5.93627
MTR10	NA	NA	NA	-0.777658	NA	NA
MUP1	NA	NA	NA	NA	NA	NA
MXR1	5.25943	5.61937	5.71738	5.45995	6.20086	4.47656
MYO2	5.12799	4.55752	4.09806	3.7635	6.93927	5.3652
NAB3	0.215592	-0.686904	0.243169	-1.60736	-0.116904	0.483567
NAB6	5.58374	5.36811	2.29087	4.13724	4.55896	NA
NAM7	6.76947	6.4002	6.48401	6.55298	4.88281	7.30695
NAP1	2.19841	1.90755	3.57925	3.89853	1.10151	3.01008
NBA1	0.27163	1.44763	-0.0606481	-0.113777	0.49692	0.128759
NCA3	NA	NA	NA	NA	NA	NA
NDC1	-0.921858	-2.211	-1.44584	-3.37805	-0.480476	-1.38343
NDE1	1.06002	NA	-5.82874	-1.9726	1.09059	0.290311
NEW1	0.485713	-0.266589	-0.393329	-0.676378	0.378703	0.369215
NFS1	NA	NA	-2.66808	-0.436073	NA	NA
NHP2	NA	NA	-0.330379	-5.95152	NA	NA
NIF3	2.56191	2.94756	1.67411	2.38217	2.57109	2.24941
NIP1	1.29529	0.779962	1.17336	2.29779	1.70529	1.99541
NIP7	1.42324	1.41224	1.2513	1.25259	0.958441	1.62058
NMD3	-0.376713	-1.45072	-0.954469	-1.74653	-0.772168	-0.949825
NMT1	-0.438336	NA	NA	-0.520797	NA	-1.22561
NOB1	3.89893	2.98874	3.64928	0.642393	1.39278	NA
NOC2	-5.5138	NA	-2.70717	-1.18099	NA	-3.26323
NOC3	1.94374	1.59508	2.04	2.12782	1.13538	3.26358
NOG1	2.20282	0.158971	1.12791	1.6643	2.3708	1.05067
NOG2	0.210183	-0.405711	0.713067	1.60045	0.374465	0.555926
NOP1	0.539429	-2.48989	-1.38288	-1.08139	-1.88509	-0.0590018
NOP12	2.03916	-0.0789475	3.1945	0.798784	0.0389911	1.92998
NOP13	2.14104	1.03058	1.34591	1.38554	1.53686	1.72377
NOP16	-1.7458	-3.0717	-2.40188	-0.689309	NA	0.296377
NOP4	5.30419	4.88843	4.98998	5.22763	5.45804	5.4042
NOP56	-0.397895	-1.14588	-1.96678	0.736181	0.345149	-0.838558
NOP58	0.13631	-0.0776146	-0.984901	-0.276525	-2.43137	-0.0481671
NOP7	-1.61891	-4.40748	-0.702576	0.131648	-7.17328	-2.07403
NOP9	-0.814358	-0.0380063	0.3437	-0.973767	-1.81615	-0.359484
NOT5	4.39466	2.94511	3.76244	3.01677	4.06741	3.87692
NPA3	1.32806	2.45538	2.29877	2.45885	2.9434	1.9441
NPC2	NA	-0.92518	-1.49927	4.38782	-1.34431	NA
NPL3	0.609103	-1.09811	-1.18646	-2.26551	0.165004	0.169412
NPL4	NA	NA	-2.1895	-3.05228	-1.67558	-1.32348
NPL6	0.448453	1.35842	4.39267	2.14358	0.939924	1.84612
NRD1	1.05942	1.85552	2.21795	1.94274	2.14654	3.87261
NRP1	4.76336	4.3061	2.97019	3.49881	4.89074	4.73205
NSR1	-2.80642	NA	1.31814	2.87294	0.56217	2.05995
NTH1	4.29653	1.18441	0.765781	-0.00454469	5.65922	1.11647
NUG1	-0.330039	-0.240374	-0.738871	0.19039	-1.86	-1.08505
NUP145	-0.520536	0.875756	-0.0197386	-0.241201	-0.855003	-0.408598
NUP192	-1.4403	-4.0206	-1.92872	0.135948	-4.95218	-3.39197
NUP60	-0.490863	0.399688	1.08769	1.6837	0.481723	1.33435
NUP84	-1.93679	NA	2.43184	-0.429029	0.500704	0.357416
OAC1	-4.58393	-5.62411	-5.21441	-5.52963	-5.08998	-1.71287
OLA1	-0.876213	-0.95512	-1.83875	-1.73016	-0.265634	-0.785504
OLE1	0.139643	-1.27494	-0.455769	-0.770795	-0.617728	-0.14538
OM45	4.56978	4.66022	NA	NA	5.86191	NA
ORA1	0.272872	0.145743	-0.0124549	1.04	0.642476	0.0265872
ORM2	1.75288	1.84787	0.525291	0.761009	2.99385	1.35097
OST1	-1.09724	-1.00639	NA	-0.610103	-1.47648	-1.77519
OYE2	1.09972	1.55248	0.992845	1.23583	1.00905	0.739169
PAA1	-0.264378	0.496177	0.552163	-0.0814809	0.64115	0.430929
PAB1	0.498207	-0.851029	-0.880883	-0.515792	-0.0187133	0.282585
PAC1	1.40666	2.49664	NA	2.6779	2.24918	-0.0359554
PAL1	1.64602	5.11553	1.8158	1.44387	2.89708	3.33126
PAN1	2.86711	3.05138	2.77372	2.65877	3.7117	3.43419
PAN5	-1.20302	-3.51799	-2.70617	-1.22173	-2.81852	-1.86493
PAP2	NA	2.51393	NA	NA	-1.57382	NA
PAT1	1.51632	0.921056	1.43171	0.777776	1.24917	1.11925
PBP1	2.78166	3.13054	2.57843	2.76947	2.8433	2.49832
PBP2	5.33964	NA	NA	NA	3.33031	4.46169
PBY1	1.62734	0.730687	1.67335	2.4578	1.87085	1.97546
PDA1	0.777361	0.789696	0.481892	3.88157	0.814184	-0.79442
PDC1	-0.59628	-1.70133	1.15765	1.44423	-1.16164	-0.143218
PDC5	0.388672	-0.135883	0.234269	1.11355	0.119135	0.598747
PDC6	-0.516127	-1.46881	NA	-1.21404	NA	-0.389808
PDE2	-1.35222	-0.901658	-0.956746	-1.42202	0.929333	NA
PDR16	2.98863	3.50756	2.65877	2.67539	4.43243	2.58611
PDR18	1.33541	NA	NA	NA	NA	NA
PDR5	-4.82051	-2.4906	-2.87888	-2.1304	NA	-1.45012
PDX3	0.312566	1.92552	1.32835	1.25707	2.46298	1.40951
PEP1	0.780783	-2.27279	-1.04926	-0.11279	-0.114484	0.757751
PEP4	-1.62844	-2.80905	-2.97247	-3.61033	-2.85844	-2.35519
PET9	-0.0219043	-2.09039	-1.54928	-0.709548	-0.532978	-0.00825548
PEX25	3.32169	1.90789	2.72122	1.19803	1.98348	NA
PEX29	NA	NA	NA	NA	NA	NA
PEX5	NA	NA	NA	3.09111	2.42004	NA
PFK1	1.38564	0.274128	0.282747	0.816838	0.827037	0.662762
PGA3	0.629655	-1.40306	-2.1894	-1.68013	-1.09874	-0.3574
PGI1	0.750629	-2.45142	0.447587	0.926709	-1.9388	-0.0958224
PGK1	-0.221246	-0.158613	0.7358	1.17757	0.329401	-0.0596227
PGM1	NA	NA	2.71797	3.56403	NA	3.21227
PGM2	-0.0476148	-1.73257	NA	NA	NA	NA
PHO8	-2.21361	-2.60479	-2.09709	-3.7144	-2.55298	-1.99962
PHO84	-1.50428	-2.00944	-1.79732	-0.599731	-1.19714	-1.57672
PHO85	3.1187	2.22197	1.7973	1.87966	3.05073	3.27583
PHO86	0.823678	1.42965	-1.41893	0.695685	1.07993	-0.113127
PIK1	0.241155	-2.84874	NA	-2.69916	-2.75716	-4.15739
PIL1	2.16932	1.20629	1.18397	0.605122	2.03499	1.54713
PIS1	1.2012	1.97773	1.21784	1.7085	2.49202	0.294498
PMA1	0.384504	-0.905404	-0.788363	-0.762134	-0.294644	-0.19825
PMT2	-0.32292	-1.08922	-1.17099	-0.94926	-0.924471	-1.14391
PMT5	-1.80048	NA	NA	NA	NA	NA
PNC1	0.831002	0.995673	-0.352481	1.15028	0.979952	0.333317
PNG1	1.98391	NA	NA	NA	NA	NA
POB3	-1.56204	NA	NA	-1.53068	NA	NA
POL12	-0.41628	0.0282931	-1.64392	-1.17257	-1.26211	-0.59128
POL31	-4.068	-5.01046	-1.22983	-3.04073	0.0708101	0.0684241
POM33	1.71657	2.62946	NA	NA	NA	NA
POR1	-0.17642	-2.29863	-1.6149	-1.08348	1.07549	-0.531946
PPE1	NA	NA	NA	NA	NA	-1.34239
PPH21	0.863917	NA	-1.62068	-3.89053	-0.708934	-0.947104
PPH3	0.527855	2.1849	2.11567	-1.98541	-0.42067	0.325707
PPT1	2.75291	3.37026	3.80805	3.04748	3.82624	2.79284
PPZ1	6.67551	2.9607	3.17847	2.86515	1.19178	4.76266
PRB1	NA	NA	NA	NA	NA	NA
PRC1	-2.29626	-1.99702	-3.45618	-3.0357	-3.1903	-3.1191
PRE2	-6.7666	-4.56431	-4.45237	NA	-2.87885	-3.76054
PRE3	0.873298	0.0396517	-1.14905	-0.0375816	0.376234	0.487384
PRE5	0.810829	2.31704	1.99432	2.2674	3.02585	1.31811
PRE7	4.39856	4.96364	5.98974	5.2265	5.70899	1.80821
PRE8	1.47501	1.64963	2.58284	2.0381	2.15749	NA
PRE9	3.80887	5.31824	5.24883	5.09399	6.77668	5.17464
PRO1	2.77258	2.15523	-0.282227	5.69309	3.58542	0.955236
PRO3	1.49442	1.52852	2.47322	4.10496	1.74822	-1.3501
PRP43	0.0551606	-2.88909	-1.88257	-1.47229	-4.25276	-2.20538
PRS1	2.65551	1.72414	1.52021	2.18653	2.65021	1.38241
PRS3	5.22781	4.02034	4.2707	5.05318	5.5554	3.30228
PRS5	3.83076	3.22681	3.01782	4.00565	4.29001	3.06212
PRT1	0.346373	-0.539179	-0.590736	0.0949093	0.414194	0.114015
PSA1	-0.204946	-1.03079	-0.473828	-0.459302	-0.729977	-0.449165
PSE1	-1.38349	NA	0.434882	2.29584	-0.302502	-1.35882
PSP1	5.70831	3.28103	6.07685	6.211	6.05659	NA
PTC2	0.267853	-5.28921	-0.591752	-1.2872	1.77372	1.39087
PTC7	3.29528	NA	3.38399	-0.352465	3.14061	NA
PTM1	NA	NA	NA	0.458239	NA	NA
PTR2	-1.07689	-0.502108	-0.368137	-1.98634	-1.83445	0.28633
PUB1	4.61375	1.76588	3.63787	4.23819	3.77824	4.51442
PUF3	1.40232	-0.0109015	1.6545	-1.10067	1.70693	0.446245
PUF4	2.6196	-1.26246	2.35024	1.72395	2.88452	2.58859
PUF6	NA	-2.24802	-1.4918	0.0444563	-1.34154	-1.61143
PUP2	1.41534	-0.00411306	0.869903	0.741598	1.24198	1.22188
PUS1	NA	4.12526	0.117509	3.00336	-3.50988	-0.778277
PUS7	-2.32982	-8.11306	0.76756	-5.39125	-2.57927	-7.20263
PWP1	1.35055	-0.250304	2.03833	3.11748	0.355358	-1.15487
PWP2	-1.71654	-2.01454	-4.56299	-3.78709	NA	NA
PYC1	-2.81241	-5.00427	-5.0041	-6.74309	-2.92767	-0.318994
PYC2	1.8191	-4.03365	-4.55244	-4.22058	-3.44563	1.54498
QCR2	2.41304	5.56106	NA	4.47426	5.24908	6.23092
QDR2	NA	NA	NA	-3.66448	NA	NA
QRI1	3.13748	2.70634	1.53603	2.00003	3.67224	NA
RAD14	NA	NA	NA	NA	NA	NA
RAD23	1.85137	0.742673	1.98387	4.26529	1.72135	2.6722
RAP1	4.88833	3.31026	2.11918	1.49592	NA	5.29267
RAS1	6.0304	4.96673	5.36581	5.19826	5.52212	4.73737
RAT1	-0.380706	-1.25439	-0.343296	-1.10038	-1.09202	-0.248971
RBG1	-0.352394	-3.65669	-1.17291	0.740076	-1.05939	1.31357
RBG2	2.49842	-1.16816	0.723285	1.17535	1.64326	1.97493
RCF2	-1.40726	-2.22062	-4.21075	-3.55401	-6.28195	NA
RCK2	5.14124	3.88418	3.88156	3.68956	4.22698	2.84099
RDH54	1.08556	0.12683	0.427364	NA	0.6108	1.02321
REA1	NA	NA	NA	NA	NA	NA
REB1	-0.736452	-2.40209	-2.88082	-5.4969	-1.3334	NA
REH1	4.67731	3.86716	4.06146	3.73965	5.00102	4.62924
RER1	4.04691	3.2806	1.29715	1.76707	2.79836	2.81715
RET1	0.612582	-0.310562	-2.02935	-2.30381	-0.196586	NA
RET2	0.465013	-1.39854	-0.579155	-0.571729	-0.686399	-1.91659
RF2	0.399589	0.664767	-0.108826	0.0175879	0.343206	-0.287405
RFA1	2.37251	-1.20585	-2.32402	-1.1718	-1.7552	0.887839
RFA2	0.526089	1.51978	1.18925	1.13441	1.50841	0.736226
RGC1	3.44929	5.10882	2.87284	2.94323	4.30186	NA
RHO1	1.44478	1.10154	1.10494	0.28455	2.05131	1.4346
RHO3	3.7695	3.24565	3.51705	2.62098	4.27231	2.71641
RIB1	3.1831	4.24309	3.41599	3.46836	4.50819	NA
RIE1	2.84154	0.987971	0.285724	1.31896	1.36766	0.624848
RIO2	4.7164	0.208886	2.06591	0.165742	1.54333	3.34958
RKM4	-2.81958	NA	NA	NA	NA	NA
RLI1	2.27743	0.825756	2.03648	2.90622	2.64384	2.46062
RMT2	2.08942	1.45984	1.84361	1.70872	2.38991	-1.75517
RNA14	-2.94799	-2.66898	-2.99926	-4.50343	-3.27096	-2.14715
RNR1	0.165314	0.296501	-0.230552	0.12	0.334845	1.30991
RNR2	-0.463492	-2.34157	-1.73318	-2.47871	-0.506137	-0.845312
RNR4	-1.02076	-1.48076	-1.31628	-1.60013	-4.74067	-0.396988
RNT1	1.54485	-0.0460473	0.14346	2.01552	NA	1.87615
ROM2	-0.2472	0.856313	0.180556	0.242771	0.367502	NA
RPA135	2.07534	2.49328	2.56475	2.13859	1.31991	1.33375
RPA190	-5.05303	-7.14425	-0.0503768	2.53154	NA	0.0332682
RPA34	NA	-0.563109	1.94395	1.59645	3.694	NA
RPA43	-1.68132	-5.58939	-5.672	-6.3955	-1.32245	-1.17192
RPA49	0.716603	7.24895	8.64843	7.7171	7.19502	5.2812
RPB2	-1.01096	-1.06513	-0.410987	-0.105222	-0.806351	0.310748
RPB8	2.82294	2.39922	3.51098	1.9232	3.48824	1.83152
RPC40	0.702835	-0.841971	1.1657	-0.977928	0.348535	0.262577
RPF1	-0.0925756	0.801418	1.14748	5.04819	0.311593	0.761594
RPF2	-0.623282	-0.366398	-0.569731	-1.63298	-0.649576	-0.313818
RPG1	-1.5221	-2.80465	-2.59405	-1.75376	-2.12949	-1.55514
RPL10	0.381615	0.57583	0.11378	-0.116029	0.167382	0.0761259
RPL11B	0.68885	0.0238235	-0.0509004	1.04205	1.10588	1.04328
RPL12A	1.86395	2.17237	2.49945	2.12244	1.82161	-0.270267
RPL12B	-0.391736	-0.222202	-0.124994	-0.0995881	-0.131514	-0.332502
RPL13A	-2.33187	-1.92605	-2.50786	-2.69039	-5.26868	-2.38754
RPL14B	0.861659	0.121542	-0.0653764	-0.301254	0.635767	0.0296583
RPL15A	0.319455	-0.218545	0.30847	0.711633	0.465587	0.709792
RPL15B	NA	NA	NA	NA	NA	NA
RPL16A	2.21535	2.20646	3.71043	3.58019	2.10331	1.05961
RPL16B	-1.31762	-0.274247	-0.485915	-0.979163	-1.32173	0.54897
RPL17A	-1.93436	-2.49528	-1.79673	-0.763169	-2.10011	-0.254353
RPL17B	0.424791	0.904988	1.39543	2.31028	1.42926	0.97686
RPL18B	1.4814	-1.85125	-1.41896	-0.986832	-1.03416	1.9513
RPL19A	-1.22669	-0.939799	-1.71033	-3.68288	-1.38261	-1.4153
RPL19B	-0.375211	-2.47282	-0.752034	0.178436	-1.16168	-0.605808
RPL1B	0.989434	1.17077	0.705257	1.2632	1.62185	0.506588
RPL20B	-0.189833	-1.34472	-0.408461	0.317257	-0.712184	-0.345499
RPL21A	-0.227287	0.69259	0.0365729	0.269629	0.970072	-0.382096
RPL22A	3.19426	2.19399	4.0615	4.22687	3.71334	-4.35104
RPL23B	0.0616422	0.767613	0.828241	1.07896	0.132081	-0.754928
RPL24A	0.10825	-0.898107	-1.68089	-1.41502	0.271452	1.13193
RPL24B	NA	-1.08007	-0.342848	0.56415	-1.57309	NA
RPL25	1.276	0.551776	0.877555	2.15394	1.95856	-0.224684
RPL26B	-3.89763	-2.43251	-1.76228	-1.76617	-2.18365	NA
RPL27A	-0.780285	-0.401461	0.539072	1.8211	-0.19257	-0.734099
RPL28	-0.900486	-0.666387	-0.280252	0.602615	-0.67253	-1.07135
RPL2B	-0.326864	-1.8175	-0.201654	-0.188961	-0.189198	-0.162439
RPL3	-0.481754	-0.55049	0.920319	0.566818	-1.14008	-0.826346
RPL30	0.448789	1.85929	2.3266	2.12905	1.79278	-0.4591
RPL31A	0.955884	-0.578986	1.48856	0.228063	-0.237583	-0.0127246
RPL32	-1.64321	-3.19372	-1.91763	-1.88407	-3.02888	-2.97631
RPL33A	2.18129	1.8038	1.57777	0.309091	1.85484	2.65865
RPL34A	0.376584	-1.87439	0.469529	2.13708	NA	-0.808998
RPL34B	-1.81789	-2.08711	-2.90425	-1.63638	-1.33565	-0.00667481
RPL35B	0.497441	0.719949	2.25108	2.14404	0.984832	0.205765
RPL36A	-0.183832	-0.601432	-2.94265	0.0212701	-0.77029	-1.50325
RPL36B	NA	NA	-0.545452	NA	NA	NA
RPL40B	0.549994	-0.993256	NA	NA	-0.263239	0.933558
RPL42A	-0.71043	NA	NA	NA	-0.469913	-0.423736
RPL43B	0.425014	-0.561201	-1.22658	-1.28303	-2.30067	-0.0916206
RPL4A	1.53088	-1.01868	-2.68809	-1.71531	-0.490715	1.35497
RPL5	1.5574	0.833078	1.13245	0.787751	1.54443	1.13438
RPL6A	1.03601	1.54764	0.339015	0.761542	0.593459	0.930899
RPL6B	-0.708682	1.11586	1.77122	2.45816	0.770848	-1.15308
RPL7A	0.743756	1.5006	NA	1.41001	1.47317	1.43696
RPL7B	1.06174	-0.192221	1.87432	1.28416	0.546174	NA
RPL8A	0.00415491	0.108819	-0.0501173	0.45405	0.511693	-0.564741
RPL8B	-3.05676	-2.88839	-4.24477	-2.80345	-3.70081	-3.57952
RPL9A	0.0203846	1.1478	1.33645	1.34526	0.29998	-0.525274
RPN1	3.34398	-1.39223	-0.762794	0.368096	0.253148	-0.689115
RPN11	2.44521	2.08545	3.37931	2.14216	1.93294	3.41735
RPN2	-1.39772	-1.40088	-0.244066	-0.230799	-0.0856796	-0.3143
RPN3	-2.09355	-0.999559	0.495834	-1.04077	-0.960475	-1.46115
RPN5	-0.192075	-4.23515	1.16196	0.818361	-1.8208	-0.550423
RPN6	0.738348	1.91782	1.26236	1.56334	2.58231	0.629354
RPN7	-1.10126	-1.80815	-3.1903	-3.52185	-1.79126	-2.51321
RPN9	2.76466	-3.33427	-0.544618	-1.44638	3.28184	2.09106
RPO21	-1.19801	-2.73748	-1.27921	-1.06861	-1.35982	-0.951966
RPO26	1.42028	4.74333	4.42335	4.61515	3.8509	4.49365
RPO31	NA	NA	-3.41358	NA	NA	NA
RPP0	-0.514737	-1.36393	-1.33645	-0.993129	-0.947338	-0.865267
RPP2B	0.498964	-1.34736	-1.09024	-1.2234	-0.211486	-0.0482455
RPS0A	1.98036	4.17576	4.64312	3.44157	4.19573	NA
RPS0B	1.51187	0.567676	1.5246	-0.121959	1.4962	1.51166
RPS10A	0.902141	0.766585	NA	-0.917891	0.752952	-0.694271
RPS10B	2.35133	3.85939	4.85991	2.96819	3.40584	NA
RPS11B	-0.691705	-1.01785	-1.14181	0.0727479	-0.85267	-0.770914
RPS12	-0.747741	-2.87161	-0.738209	0.0302074	-0.923171	-1.15432
RPS13	-0.955047	0.00445454	0.215338	0.203286	-0.704255	0.314775
RPS14A	NA	NA	NA	NA	NA	-3.22626
RPS14B	0.459734	1.37729	1.17933	1.01643	2.69759	0.55209
RPS15	1.07309	0.591971	4.02324	3.51932	-0.744039	0.709094
RPS16A	-0.244203	0.582014	0.445576	0.612323	0.568722	-0.579362
RPS16B	0.768506	-0.47771	0.00696362	0.284796	0.213262	0.179773
RPS17A	0.408891	1.19892	1.00292	0.0241013	1.27475	-0.564653
RPS17B	2.83338	3.72567	3.67645	3.16446	3.83577	2.58301
RPS18B	1.27588	0.333067	0.557692	0.851995	0.441029	0.535836
RPS19B	-0.154426	-0.110904	-0.96278	-0.434986	0.640683	-2.74256
RPS1A	-1.91343	-2.06814	-0.699831	1.73438	-1.61175	-1.03669
RPS1B	0.00164644	-1.71622	0.777915	-0.645419	-0.184804	0.1072
RPS2	0.214154	0.576772	0.843608	1.08123	1.08989	-0.309905
RPS20	0.448146	2.04267	3.19198	4.21417	0.205049	-0.376632
RPS21A	-0.161446	NA	3.09739	2.93161	NA	0.153441
RPS22A	0.992863	1.92231	1.68861	1.33205	3.1817	1.99667
RPS22B	NA	NA	NA	NA	NA	NA
RPS23A	-1.87409	-1.17186	-1.98021	-2.32991	-2.05729	-0.883763
RPS23B	1.34206	0.363174	1.22931	3.07114	-0.772706	1.04787
RPS24B	-1.09328	-1.51745	-0.546046	0.221804	-0.789446	-1.17926
RPS25A	-0.38714	0.938582	1.03687	0.556819	0.206059	-1.31288
RPS26A	NA	1.05519	0.799809	1.2502	0.946813	-0.866326
RPS26B	-3.80178	1.38416	0.956021	0.559675	-2.40254	-2.86249
RPS27A	-6.81043	NA	-1.96768	-0.819672	0.542553	-0.111587
RPS27B	-0.512184	0.665694	0.0551976	0.943564	0.648555	-0.525099
RPS29B	NA	NA	NA	-1.47056	NA	NA
RPS3	-0.268119	-1.45532	-0.867084	-0.642726	-0.858259	-0.674373
RPS30B	-1.56298	0.339171	0.805495	0.821729	0.44482	-0.607905
RPS31	0.578091	1.10829	2.9672	4.14431	1.06033	-0.0406037
RPS4B	-0.362279	-0.987941	-0.0922105	0.60447	-0.494495	-0.388098
RPS5	1.49317	0.709956	1.2249	1.40886	1.65357	0.879531
RPS6B	0.595838	0.508956	1.11505	2.46216	1.02615	0.925335
RPS7A	-2.37855	-2.1185	-1.17797	-0.128783	-2.61953	-2.91371
RPS7B	5.46472	3.67522	0.916647	4.2441	3.33405	4.81636
RPS8B	-0.611819	-0.799696	-0.810246	0.139334	-0.189629	-0.847716
RPS9B	NA	-4.23306	-4.63302	-4.27923	-4.45812	NA
RPT1	1.86331	1.41566	0.911251	1.03355	2.19129	1.38619
RPT2	4.94101	5.54219	6.8838	6.82934	5.5085	2.60782
RPT4	-0.902499	-6.55411	-1.65483	-1.44172	-5.01487	-0.0883843
RPT6	-2.26071	-2.67067	-3.1961	-2.56456	-2.82999	-1.49939
RRB1	1.23382	0.326839	0.954457	1.54843	0.886742	1.05817
RRP12	-2.86963	-0.135847	-7.10824	2.65216	0.833367	-1.88085
RRP4	-2.02111	-1.78089	-1.95181	-2.44971	-1.75216	-3.31671
RRP5	0.906716	-0.156463	0.180952	2.96115	-2.02295	-0.684211
RRP6	-0.00424993	-0.118814	0.861141	-1.24493	-0.32844	-2.76406
RRP8	NA	0.156712	2.57777	0.10305	NA	NA
RRP9	NA	-1.39217	-1.19172	1.85772	NA	NA
RSN1	0.778334	2.05828	2.3947	1.63458	0.00517151	NA
RSP5	3.83311	2.93367	1.67251	1.30834	3.61201	4.2793
RTF1	2.27715	1.68682	1.79271	1.85323	-0.244321	NA
RTG2	3.71642	0.408086	1.81866	3.29408	2.49661	2.42786
RTN1	0.844559	1.24058	0.728561	1.22919	0.603738	0.505459
RVB1	0.221594	-0.10095	-0.200081	0.910271	-0.0397565	-0.0117415
RVB2	4.0176	4.26226	1.38517	5.37869	1.90485	1.94047
RVS161	1.74253	0.950759	0.537468	0.918068	1.46785	1.54057
RVS167	3.74161	3.22164	3.20088	2.84828	3.53166	3.25638
SAC1	2.20187	0.893694	0.946321	1.88527	1.01676	1.19017
SAC6	-0.114905	-1.77689	-1.26494	0.437395	-0.93216	-1.965
SAH1	-0.605008	-1.20565	-1.06419	-0.334027	-0.756932	-0.0221477
SAM1	4.30125	3.77212	4.93747	5.67666	3.85591	4.21845
SAM2	-0.41427	-0.144621	-0.353172	-0.931097	-0.0607821	-0.1136
SAP185	1.77606	NA	-0.0328067	0.44	1.07956	0.432987
SAP190	2.38876	-0.266864	2.41561	2.5185	2.20193	0.818986
SAR1	0.622204	0.495637	0.659985	0.563894	1.03326	-0.200148
SAS10	-5.487	-5.21296	-4.93611	-6.39424	-8.90656	-6.09699
SBP1	-1.32518	-5.27566	-4.36505	-1.54568	-4.52958	-0.542469
SCL1	0.188814	-0.51962	-0.253057	-0.811816	0.313753	0.4146
SCO1	NA	NA	NA	NA	NA	NA
SCP160	1.41962	-1.25512	0.309044	0.0368916	-0.192019	0.247485
SCS2	1.17919	3.07015	3.00588	3.77038	2.08755	NA
SCS7	2.79872	3.25028	3.46741	2.8227	4.02773	2.42971
SCW10	NA	NA	NA	-0.878355	NA	NA
SCW4	1.50798	0.108124	NA	-0.705787	-1.78401	NA
SDH1	-1.20321	NA	-2.97638	-3.1607	NA	NA
SDH9	NA	-1.94122	NA	-2.799	0.357505	NA
SDS23	2.3119	2.24156	3.13027	2.55632	4.04464	3.65632
SEA4	4.8892	3.82114	1.3664	0.0119397	4.64673	3.45639
SEC13	2.13549	0.870453	-0.0207287	0.921822	1.77007	0.983184
SEC14	0.26186	2.21147	0.814682	1.27544	0.791837	-0.618116
SEC16	4.2832	3.47194	3.22242	3.78163	4.55723	3.81358
SEC21	1.47669	0.319041	0.505476	0.183615	1.05765	0.804396
SEC23	4.36107	1.92072	2.08163	1.91523	2.57346	2.72194
SEC24	2.86051	2.46576	2.49742	2.7264	2.69467	2.3109
SEC26	-0.217451	-0.691436	1.95625	0.526056	0.170498	-1.14923
SEC27	-0.634564	-1.59357	-1.23652	-2.03559	-0.570568	-3.02235
SEC28	-1.00171	-4.64509	-4.56237	-5.21104	-4.3925	-0.625205
SEC31	2.19629	2.21271	2.47536	1.834	2.70757	2.32023
SEC4	1.85837	1.5268	2.08623	0.216783	-0.381169	0.615852
SEC53	1.55845	1.27517	1.12482	1.32054	2.50495	1.59713
SEC61	3.19036	-0.38713	0.427575	1.59089	-0.35894	0.62338
SEC65	2.97671	2.63876	4.18865	3.59427	3.9823	NA
SEC7	0.873388	-1.85284	-5.96584	2.39431	-1.57917	0.286247
SER3	0.133188	-1.41937	-1.22995	-1.475	-1.29414	-0.838592
SER33	5.23937	5.29358	5.10717	4.54695	5.49003	4.53368
SES1	0.41762	0.248232	2.43755	3.46793	0.0637482	0.754408
SFI1	NA	NA	NA	NA	NA	NA
SFT2	NA	-1.36482	NA	NA	0.246928	-0.415485
SGD1	NA	-1.08543	NA	-1.04087	NA	1.99553
SGN1	3.52942	3.10367	3.16592	2.55544	3.32826	0.523113
SHE4	NA	NA	NA	NA	NA	NA
SHM2	-2.34722	-2.20294	-2.10491	-1.74808	-0.314114	-2.19086
SHO1	1.03638	0.648278	0.255181	0.555644	0.686886	0.0612939
SHP1	3.41579	1.21729	2.59334	1.8871	3.47257	2.82336
SIN3	1.63549	-2.9446	3.4158	1.16314	-3.15376	1.37913
SIS1	1.31879	0.910194	1.28571	1.14954	1.76969	0.404898
SIT4	-1.04531	-1.98126	-1.75771	-1.66402	-0.900097	0.515932
SLA1	3.9049	3.33941	2.64442	2.10379	2.88926	1.48557
SLC1	1.3389	0.278065	0.907719	0.839267	0.323912	-0.389433
SLD7	NA	NA	NA	NA	NA	NA
SLT2	4.3366	4.39159	4.07714	4.31262	5.36206	3.33019
SND3	2.8814	-0.197226	1.39827	0.0761825	1.74075	-0.408007
SNF1	0.457156	-2.70087	-1.77138	0.555545	0.131739	-1.17821
SNL1	-1.70744	1.37688	0.963982	-0.166552	1.45865	0.347464
SPC42	2.72105	2.46938	2.22794	1.26412	2.81185	1.73699
SPE1	NA	NA	NA	NA	NA	NA
SPE3	-0.168472	-1.03893	0.683928	-0.617071	-0.984034	0.294296
SPF1	1.83443	NA	-3.65912	2.90905	NA	NA
SPN1	4.7548	4.12682	3.73371	3.15672	4.66893	5.19017
SPP382	NA	NA	NA	NA	NA	NA
SPT16	NA	-5.60254	-2.35564	-1.99266	NA	1.55509
SPT5	-1.59241	-2.05657	-2.0802	-1.17033	-2.06716	-1.83704
SPT6	0.0392144	-1.65565	1.50376	-0.696142	-2.11535	-2.20017
SRO9	1.79751	0.20793	1.6096	0.273942	0.490375	1.95109
SRP1	1.63998	1.39249	0.707109	1.27626	2.67887	2.34813
SRP101	NA	0.626274	0.0059704	1.67274	NA	NA
SRV2	1.93807	0.909969	1.79991	0.868818	1.11778	-0.961726
SSA1	0.742665	-0.136317	0.102511	-0.0613558	0.706052	0.612023
SSA2	0.42262	-0.166006	-0.623597	-0.974504	-0.240528	0.520484
SSB2	3.0419	1.64368	3.86647	3.87644	2.66969	2.00424
SSC1	-0.413158	0.379096	1.60733	2.82163	0.240908	1.0866
SSE1	0.132856	-1.28077	-0.430694	-0.362554	-0.168025	0.0380534
SSH1	-0.359482	1.01364	0.892433	-1.7676	0.43451	1.74478
SSO1	3.79664	4.30147	4.50031	3.12806	4.25354	0.107133
SSO2	-0.1434	1.07635	1.24587	1.30095	1.32369	-0.686853
SSQ1	NA	NA	NA	-2.16848	NA	NA
SSS1	-0.042258	0.55704	0.282869	0.969179	1.3425	NA
SSZ1	1.07603	0.543787	0.721899	0.831421	0.672555	1.18658
STI1	2.85473	1.65793	1.35213	1.12731	2.39557	1.76615
STM1	1.05929	2.63084	2.02502	2.23581	2.09727	-0.0804049
STV1	0.957456	NA	NA	NA	-1.52874	NA
SUB1	2.69441	4.02765	6.01486	2.84894	4.03613	2.69424
SUB2	1.92988	1.69793	2.64064	1.8406	1.4212	1.60807
SUI2	0.598182	0.0112094	1.46182	2.14308	0.769114	-0.94283
SUI3	1.59261	-1.78344	1.78306	4.73286	1.13247	1.50392
SUP35	1.60335	1.14511	1.12781	2.25494	1.82925	1.81911
SUP45	1.42533	2.31168	2.13093	2.61141	2.78361	2.42545
SUR7	-2.62377	-1.30287	-1.21104	-0.732096	-2.25507	-3.40699
SVF1	0.48445	-2.11986	-2.16975	-3.17164	-5.59062	1.50537
SVL3	3.97223	4.8136	5.02333	5.03567	4.47029	3.82834
SXM1	-1.10282	-0.450661	-2.72696	-1.01371	-3.44519	-1.02238
TAL1	-1.50553	-2.66381	0.787986	1.7121	1.55635	-0.642101
TBS1	0.163168	NA	NA	NA	NA	-1.48861
TCB3	1.72915	2.47012	2.52281	2.44399	3.07284	2.15652
TCP1	0.403062	-2.78562	-0.377188	0.554734	-1.79975	0.907823
TDH2	1.94816	3.26557	3.59138	3.92461	3.62169	0.288484
TEF1	-0.074645	-2.94758	0.339306	1.12896	1.15307	0.0672444
TEF2	-0.417778	-1.13408	-0.79805	-1.14529	-0.962646	-0.298973
TEF4	0.0491666	-1.42993	-0.779943	-0.844757	-0.841923	-0.683428
TFC4	NA	NA	NA	NA	NA	4.51488
TFG2	0.671324	-0.588714	0.322618	0.511043	1.98386	NA
THR1	-1.32696	0.69447	1.00283	1.68714	2.06437	1.07186
THS1	3.40725	0.535685	1.61033	1.51281	0.317947	0.907127
TIF1	2.50718	1.10998	0.845543	0.402602	2.27824	2.37793
TIF11	0.0649829	-0.406189	1.22684	2.03841	1.3953	-1.91969
TIF2	0.386796	0.00105087	-0.57554	0.878126	-0.34599	0.83281
TIF3	1.79015	1.21013	1.11352	0.569383	2.12175	1.8702
TIF34	0.212485	-1.39377	-1.23431	-1.74808	-0.639381	-0.825767
TIF35	1.88077	0.914153	0.613072	0.529275	2.34303	1.46244
TIF4631	1.3128	-0.708246	1.41809	3.82197	2.77662	1.66278
TIF4632	7.43645	6.72631	6.90364	5.82335	4.64154	6.61096
TIF6	4.69129	5.5177	4.19069	5.84887	3.99465	4.54821
TIM50	NA	NA	NA	2.96462	NA	NA
TKL1	-0.768379	-3.62982	0.47857	1.14407	-2.94346	-2.21681
TMA108	2.69861	1.27719	1.21593	1.41739	1.27551	2.38493
TMA46	3.98872	3.19524	2.87462	2.0908	3.77946	2.76372
TOM70	3.45882	0.386317	2.51203	3.78605	3.1672	2.02157
TOP2	NA	NA	NA	NA	NA	NA
TPA1	2.36931	2.43176	3.80093	3.95666	2.53739	3.25487
TPI1	-0.337503	0.434754	1.81885	2.75308	1.01682	0.482647
TPK2	-1.00546	-3.14645	-3.96196	-1.09338	-3.26412	-1.34357
TPK3	NA	1.60674	4.85006	NA	1.1763	-1.0654
TPP1	NA	NA	NA	-0.526587	NA	NA
TPS1	-1.66732	-3.23149	-3.22124	-3.49611	-1.94573	-2.06992
TPS2	4.18477	3.8103	4.40905	4.76019	5.36972	2.94418
TPS3	2.18712	0.504176	0.113077	-0.382542	0.707061	0.37908
TRL1	6.912	2.36513	NA	NA	3.32567	4.49861
TRM1	-2.94848	-1.75688	-0.611931	-0.976326	1.9842	-1.56499
TRM3	-3.88671	NA	NA	-1.65385	NA	NA
TRM5	NA	NA	NA	NA	NA	NA
TRM8	1.1542	2.23598	2.17508	3.16216	2.11885	1.13279
TRM82	NA	3.31808	4.81651	4.66693	2.46469	0.775779
TRP2	1.53667	0.126821	0.419489	0.376688	1.822	3.23457
TRP3	0.761712	2.05678	1.67996	3.63289	2.70411	3.47522
TRP5	0.652064	0.375944	1.75361	3.12702	1.29833	1.84563
TSA1	1.45506	0.879322	0.852782	0.789669	1.85446	0.484871
TSC13	-1.58894	0.886257	-2.15243	-3.30809	-3.96757	-2.59546
TSR1	3.52431	2.39205	2.19213	1.98407	3.42972	2.78252
TUB1	-1.542	-2.55439	-2.52801	-3.53353	-3.0502	-0.757941
TUB2	0.0505193	-1.60983	-0.820873	-0.826143	-1.63742	-0.55384
TUF1	-1.34361	-1.89567	-2.50909	-1.94726	-0.62878	-0.213834
TUM1	1.82662	-2.25358	0.354377	-0.567203	1.22743	1.92358
TYS1	-0.477692	-4.20669	-0.438479	-1.8904	-3.40497	-3.17767
TYW1	0.491148	-7.04747	-1.15351	-2.54109	-0.391333	-0.630608
UBA1	2.09074	0.266207	1.93594	3.35192	0.402601	2.09612
UBA4	0.837552	0.597752	-1.28195	-0.734433	0.25106	-0.341734
UBP1	2.27204	0.412813	-0.15706	NA	0.838979	3.6347
UBP12	1.40981	NA	NA	-5.9076	NA	-1.21537
UBP15	1.55423	NA	NA	NA	NA	1.71498
UBP2	-1.92098	NA	NA	-2.78806	NA	NA
UBP3	-0.396892	-1.30649	-0.20217	-0.37577	-1.12621	-0.674279
UBP6	0.265905	-5.40683	-2.31299	-5.19467	-1.73592	-1.90413
UBR1	NA	NA	NA	NA	NA	NA
UFD1	0.793166	0.832524	1.06372	7.17156	1.77383	2.10805
UFD2	1.45635	NA	0.822036	-1.07844	-3.41443	0.864055
UGP1	2.66166	1.16692	2.11641	2.94528	2.07223	3.33038
URA1	0.371454	-2.89141	1.35843	9.32431	-5.16426	9.94939
URA2	-0.687224	-2.1024	-1.68195	-0.910947	-1.13263	-1.05369
URA7	-0.0706759	-1.3468	-0.610101	0.0430207	-1.10027	-0.0892765
URB1	2.4653	NA	1.57083	2.77098	-0.151297	1.45784
URE2	-0.242547	0.460179	-0.908049	-1.22763	1.29467	0.304523
UTP10	NA	NA	-4.40608	-0.81373	NA	-2.60592
UTP13	-0.841682	NA	-1.68324	NA	NA	NA
UTP20	-4.67673	-5.30904	-1.56274	-1.02313	NA	-4.12747
UTP23	1.32511	1.6083	1.47016	0.616635	0.872417	1.53946
UTP5	-0.836937	-1.66644	-2.94011	-2.35111	-1.34007	-0.33168
UTP8	-0.0219371	0.652618	-0.543046	-0.237327	0.269023	-0.613504
UTR1	4.69969	3.0858	8.32429	7.82591	5.09734	NA
VAS1	1.24459	1.55051	1.72744	3.03767	0.0826492	2.16475
VMA1	0.456858	-0.308541	-0.0619442	-0.313839	0.329424	0.187324
VMA13	1.08212	1.71034	0.251788	0.711472	1.38181	0.552372
VMA16	NA	0.799497	0.212293	NA	NA	-1.11212
VMA2	0.44655	-0.444703	-0.316787	-0.647927	-0.271089	1.09457
VMA4	1.75941	3.06996	3.01334	3.45908	3.18814	0.628563
VMA5	-2.69318	-2.27326	-2.36154	-2.63403	-1.59769	-2.44106
VMA6	3.27843	2.41456	0.45641	3.21326	2.62893	2.32388
VMA8	1.92131	0.586521	0.0373017	0.10828	1.46589	0.920529
VMA9	1.32421	-0.723416	0.170809	-1.30332	0.860054	0.323458
VPH1	0.904598	0.32873	-0.705118	-0.188014	1.08588	-0.214206
VPS1	0.799726	-0.43215	-0.263109	-0.117803	0.891254	1.05275
VPS20	1.51852	0.0661687	NA	1.03287	NA	NA
VPS35	-1.07397	0.509135	2.02293	0.963614	-0.516731	2.51191
VPS54	NA	-1.55644	-0.195669	NA	NA	NA
VTC1	-0.437515	NA	NA	NA	NA	NA
VTC2	1.90076	-0.575475	1.5368	3.56562	1.59601	2.82669
VTC3	1.40764	1.04808	-0.668494	1.24983	1.53888	1.38027
VTC4	0.937417	0.612589	0.0642455	0.62078	0.112754	0.920853
WBP1	-0.898109	0.343441	-0.587801	-0.350686	-0.583243	0.361771
WRS1	-0.652187	NA	-0.644918	3.85106	NA	2.33981
WTM1	-1.34114	-0.271921	-0.558653	-1.14698	-0.351219	-0.882616
XRN1	2.84491	1.39829	1.80901	3.50801	1.11466	1.75159
YAR009C	0.954057	-3.76998	1.10048	-2.69495	-0.0901445	-0.972232
YBR096W	-1.63239	2.01004	2.20911	-1.31458	-1.59685	NA
YBR242W	-0.858699	-1.3944	-1.84147	-1.23269	-0.864876	NA
YBT1	0.126725	-2.06439	-1.89584	-0.927783	-1.43143	-0.926867
YCF1	0.759714	-2.047	-4.51275	0.49418	-1.78312	-2.11001
YCK2	1.19375	1.85237	1.05898	0.767235	1.78584	0.693549
YDJ1	0.907723	0.529744	0.98151	0.558628	1.13707	0.451727
YDL086W	3.41769	2.66903	3.24057	2.78722	3.49209	2.49028
YDR341C	-4.66282	-5.81565	-3.06172	-3.25775	-5.11229	-1.23615
YEF3	-0.677603	-1.3433	-0.496037	-0.409144	-0.351856	-0.596435
YET1	2.98506	1.27541	3.18358	NA	1.37149	0.883058
YFR006W	1.81563	0.838774	-0.430247	-1.98939	1.52687	1.76768
YGR054W	0.953358	0.239855	-0.0889724	0.902852	0.952599	0.768106
YHB1	0.557586	-1.21572	-1.53727	-0.558	-0.148727	0.780505
YHM2	-0.158734	-0.42963	-0.181124	1.07334	0.889851	NA
YHR020W	0.27159	-0.750735	1.19871	2.22055	0.58268	0.563019
YHR112C	0.361477	NA	-0.67485	NA	NA	NA
YIP3	6.14381	-1.62042	-2.32366	6.66336	6.49471	NA
YIP4	3.49384	2.66809	3.40571	3.69319	5.10822	2.57291
YIP5	3.59399	2.74755	4.05712	1.61288	3.88254	2.72248
YLL054C	NA	NA	NA	NA	NA	NA
YMC1	NA	-1.82176	-0.96632	-0.577928	1.08646	NA
YMR027W	-0.97346	-0.365952	-0.580095	2.68265	0.23567	1.54199
YMR099C	4.02053	5.91846	5.12675	6.01754	5.61135	2.39373
YOP1	1.89141	2.70643	1.78213	2.04859	1.81188	1.47405
YPK1	1.68897	2.35442	0.737622	2.08876	2.62419	1.11783
YPL088W	-0.0436102	-1.55455	-2.41994	0.0469052	0.0346094	NA
YPL257W-A	NA	NA	NA	-5.68326	NA	-1.59602
YPR1	NA	NA	0.0158295	1.26978	NA	-0.387564
YPT1	0.741419	1.1041	2.41056	1.43764	3.05471	1.30878
YPT31	-1.0396	-0.0890918	-0.518291	-0.69713	-0.415908	-1.92561
YPT7	3.72053	4.4917	4.36442	3.30002	2.39473	1.17694
YRA1	-0.791852	-0.738403	-0.538772	-0.360959	0.408161	-1.2654
YRA2	4.47194	3.94558	3.85835	3.63577	4.60859	2.03392
YRB1	NA	-0.0362936	4.29618	2.79321	-0.517059	NA
YRO2	NA	NA	NA	NA	1.44982	NA
YTA12	NA	NA	-7.93152	NA	NA	NA
ZPR1	1.68298	-0.278943	-0.0166523	-0.238717	0.355145	0.822122
ZRC1	2.54421	1.77524	1.44189	0.677782	2.36931	2.12487
ZRT1	-1.90196	-4.35807	-4.2919	NA	NA	-2.66503
ZTA1	-2.61565	-4.24325	NA	NA	0.948024	1.1158
ZUO1	0.989701	1.08938	2.41517	2.5547	1.41574	0.763172
ZWF1	1.27036	-0.601337	0.315019	0.884578	0.577376	1.13034
