# Supplementary material for: Ultra-dynamic assemblies of glycolytic enzymes by quinary determinants
Source: Research Square preprint supplement (doi:10.21203/rs.3.rs-7387153/v1), 2025-10-03
Supplement: Supplementary file 4 [file c31c581fead72440884065ae.docx]

**Supplementary Table 2. Plasmids.**

| Relevant features | Name | Source |
| --- | --- | --- |
| *GAL1p*-*CAS12A-NLS-3HA KAN amp ori* | pMaM486 | Michael Knop |
| *NeonG KAN* (self-integrating cassette) *amp ori* | pMaM505 | Michael Knop |
| *Scarlet HYG* (self-integrating cassette) *amp ori* | pBeB019 | Michael Knop |
| *Cherry HYG* (self-integrating cassette) *amp ori* | pMAG2937 | This work |
| *TEF1p-GFP URA3 ARS1 CEN4* *amp ori* | pMAG1228 | This work |
| *FBA1p-NeonG URA3 ARS1 CEN4* *amp ori* | pMAG3398 | This work |
| *FBA1p-DHR10-NeonG URA3 ARS1 CEN4* *amp ori* | pMAG3400 | This work |
| *FBA1p-DHR10_1-NeonG URA3 ARS1 CEN4* *amp ori* | pMAG3401 | This work |
| *FBA1p-DHR10_2-NeonG URA3 ARS1 CEN4* *amp ori* | pMAG3402 | This work |
| *FBA1p-DHR10_3-NeonG URA3 ARS1 CEN4* *amp ori* | pMAG3403 | This work |
| *FBA1p-FBA1-NeonG URA3 ARS1 CEN4* *amp ori* | pMAG3383 | This work |
| *FBA1p-PFK2-NeonG URA3 ARS1 CEN4* *amp ori* | pMAG3390 | This work |
| *FBA1p-HsPFKM-NeonG URA3 ARS1 CEN4* *amp ori* | pMAG3392 | This work |
| *FBA1p-PGI-NeonG URA3 ARS1 CEN4* *amp ori* | pMAG3394 | This work |
| *FBA1p-Cherry LEU2 ARS1 CEN4* *amp ori* | pMAG3396 | This work |
| *FBA1p-DHR10_4-Cherry LEU2 ARS1 CEN4* *amp ori* | pMAG3404 | This work |
| *FBA1p-DHR10_5-Cherry LEU2 ARS1 CEN4* *amp ori* | pMAG3405 | This work |
| *FBA1p-DHR10_6-Cherry LEU2 ARS1 CEN4* *amp ori* | pMAG3406 | This work |
| *FBA1p-DHR10_7-Cherry LEU2 ARS1 CEN4* *amp ori* | pMAG3407 | This work |
| *FBA1p-FBA1-Cherry LEU2 ARS1 CEN4* *amp ori* | pMAG3382 | This work |
| *FBA1p-PFK2-Cherry LEU2 ARS1 CEN4* *amp ori* | pMAG3384 | This work |
| *FBA1p-HsPFKM-Cherry LEU2 ARS1 CEN4* *amp ori* | pMAG3386 | This work |
| *FBA1p-PGI-Cherry LEU2 ARS1 CEN4* *amp ori* | pMAG3388 | This work |
| *CMVp-AzamiG NEO/kan ori* | pMAG3371 | This work |
| *CMVp-AzamiR NEO/kan ori* | pMAG3373 | This work |
| *CMVp-EGFP NEO/kan ori* | pEGFP-N1 | Clontech |
| *CMVp-HsALDOA-EGFP NEO/kan ori* | pMAG3409 | This work |
| *CMVp-HsGAPDH-EGFP NEO/kan ori* | pMAG3410 | This work |
| *CMVp-HsGPI-EGFP NEO/kan ori* | pMAG3408 | This work |
| *CMVp-HsPFKM-EGFP NEO/kan ori* | pMAG3412 | This work |
| *CMVp-HsPKM-EGFP NEO/kan ori* | pMAG3411 | This work |
| *CMVp-Scarlet NEO/kan ori* | pScarlet-N1 | Oskar Laur |
| *CMVp-HsALDOA-Scarlet NEO/kan ori* | pMAG3414 | This work |
| *CMVp-HsGAPDH-Scarlet NEO/kan ori* | pMAG3415 | This work |
| *CMVp-HsGPI-Scarlet NEO/kan ori* | pMAG3413 | This work |
| *CMVp-HsPFKM-Scarlet NEO/kan ori* | pMAG3417 | This work |
| *CMVp-HsPKM-Scarlet NEO/kan ori* | pMAG3416 | This work |
