# Supplementary material for: Ultra-dynamic assemblies of glycolytic enzymes by quinary determinants
Source: Research Square preprint supplement (doi:10.21203/rs.3.rs-7387153/v1), 2025-10-03
Supplement: Supplementary file 5 [file e7ec9e067889987501338d27.docx]

**Supplementary Table 1. Yeast strains.**

| Relevant genotype | Name | Source |
| --- | --- | --- |
| Mat**a** *leu2-3,112 trp1-1 ura3-1 ade2-1 his3-11,15 can1-100* | W303-1A | Our lab stocks |
| Mat**a** *GAL1p-CAS12A-NLS-3HA* | MAG2878 | This work |
| Mat**a** *ARG1p-NeonG GAL1p-CAS12A-NLS-3HA* | MAG3038 | This work |
| Mat**a** *CDC19-NeonG GAL1p-CAS12A-NLS-3HA* | MAG2900 | This work |
| Mat**a** *ENO2-NeonG GAL1p-CAS12A-NLS-3HA* | MAG2972 | This work |
| Mat**a** *FBA1-NeonG GAL1p-CAS12A-NLS-3HA* | MAG2896 | This work |
| Mat**a** *GPM1-NeonG GAL1p-CAS12A-NLS-3HA* | MAG2970 | This work |
| Mat**a** *PFK1-NeonG GAL1p-CAS12A-NLS-3HA* | MAG2894 | This work |
| Mat**a** *PGI1-NeonG GAL1p-CAS12A-NLS-3HA* | MAG2892 | This work |
| Mat**a** *PGK1-NeonG GAL1p-CAS12A-NLS-3HA* | MAG2968 | This work |
| Mat**a** *TDH2-NeonG GAL1p-CAS12A-NLS-3HA* | MAG2898 | This work |
| Mat**a** *TPI1-NeonG GAL1p-CAS12A-NLS-3HA* | MAG2966 | This work |
| Mat**a** *URA1-NeonG GAL1p-CAS12A-NLS-3HA* | MAG2868 | This work |
| Mat**a** *URA2-NeonG GAL1p-CAS12A-NLS-3HA* | MAG2870 | This work |
| Mat**a** *URA6-NeonG GAL1p-CAS12A-NLS-3HA* | MAG2874 | This work |
| Mat**a** *URA7-NeonG GAL1p-CAS12A-NLS-3HA* | MAG2876 | This work |
| Mat**α** *leu2-3,112 trp1-1 ura3-1 ade2-1 his3-11,15 can1-100* | W303-1B | Our lab stocks |
| Mat**α** *GAL1p-CAS12A-NLS-3HA* | MAG2880 | This work |
| Mat**α** *ASN1p-Cherry GAL1p-CAS12A-NLS-3HA* | MAG3039 | This work |
| Mat**α** *CDC19-Cherry GAL1p-CAS12A-NLS-3HA* | MAG2890 | This work |
| Mat**α** *ENO2-Cherry GAL1p-CAS12A-NLS-3HA* | MAG2992 | This work |
| Mat**α** *FBA1-Cherry GAL1p-CAS12A-NLS-3HA* | MAG2886 | This work |
| Mat**α** *GPM1-Cherry GAL1p-CAS12A-NLS-3HA* | MAG2990 | This work |
| Mat**α** *PFK1-Cherry GAL1p-CAS12A-NLS-3HA* | MAG2884 | This work |
| Mat**α** *PGI1-Cherry GAL1p-CAS12A-NLS-3HA* | MAG2882 | This work |
| Mat**α** *PGK1-Cherry GAL1p-CAS12A-NLS-3HA* | MAG2988 | This work |
| Mat**α** *TDH2-Cherry GAL1p-CAS12A-NLS-3HA* | MAG2888 | This work |
| Mat**α** *TPI1-Cherry GAL1p-CAS12A-NLS-3HA* | MAG2986 | This work |
| Mat**α** *URA1-Cherry GAL1p-CAS12A-NLS-3HA* | MAG2858 | This work |
| Mat**α** *URA2-Cherry GAL1p-CAS12A-NLS-3HA* | MAG2860 | This work |
| Mat**α** *URA6-Cherry GAL1p-CAS12A-NLS-3HA* | MAG2864 | This work |
| Mat**α** *URA7-Cherry GAL1p-CAS12A-NLS-3HA* | MAG2866 | This work |
| Mat**a** *FLAG-APEX2-NES* | MAG3036 | This work |
| Mat**a** *CDC19-FLAG-APEX2-NES* | MAG3028 | This work |
| Mat**a** *ENO2-FLAG-APEX2-NES* | MAG3032 | This work |
| Mat**a** *FBA1-FLAG-APEX2-NES* | MAG3026 | This work |
| Mat**a** *PGI1-FLAG-APEX2-NES* | MAG3024 | This work |
| Mat**a** *PGK1-FLAG-APEX2-NES* | MAG3030 | This work |
| Mat**a** *THR4-FLAG-APEX2-NES* | MAG3034 | This work |
